# Supplementary material
Source: HighWire-hosted journal article supplement (https://cmaj.ca/highwire/filestream/59336/field_highwire_adjunct_files/0/141349-res-1-at.pdf)
Supplement: 141349-res-1-at.pdf [file 141349-res-1-at.pdf]

## **Appendix 1 (as supplied by the authors): Online-only supplement**

### **SUPPLEMENTAL METHODS**

#### **1) Use of local conventional cTn values for adjudication of final diagnoses**

For the Roche cTnT 4<sup>th</sup> generation assay, the 10% CV level is 0.035ug/l. The laboratories of the participating sites reported only two decimals; therefore 0.04ug/l was used as a cut-off for myocardial necrosis. In order to fulfil the criteria of a significant change (30% of 99<sup>th</sup> percentile or 10% CV level), a patient would e.g. need to have a level of <0.01ug/l at presentation and 0.04ug/l at 6h. A patient would also qualify if the first level is 0.02ug/l and the second 0.04ug/l. A patient would not fulfil the criteria if the first level is 0.03ug/l and the second is 0.04ug/l. If the first level is 0.04ug/l, the second level needs to be at least 0.06ug/l.

For the Abbott AxSYM cTnI ADV, the 10% CV level is 0.16ug/l. A patient having 0.16ug/l at presentation would meet the criteria for significant change if the second was  $\geq 0.21$ ug/l. A patient having <0.12ug/l at presentation (limit of detection) would qualify if the second is >0.16ug/l.

For the Beckmann Coulter AccuTnI, the 10% CV level is 0.06ug/l. A patient having 0.06ug/l at presentation would qualify if the second is  $\geq 0.08$ ug/l. A patient having 0.05 at presentation would qualify if the second is 0.07ug/l, but not 0.06ug/l. A patient having undetectable cTnI (cTnI<0.01ug/l) at presentation would qualify if the second is  $\geq 0.06$ ug/l.

#### **2) Use of hs-cTnT for adjudication of final diagnoses**

In order to identify additional patients with small AMIs that were missed by the adjudication using the less sensitive conventional cTn assays a second adjudication

using hs-cTnT was performed in all non-AMI patients according to the first adjudication. For hs-cTnT the 99<sup>th</sup> percentile (14ng/l) was used as cut-off for myocardial necrosis.<sup>1,2</sup>

Absolute changes in hs-cTnT were used to determine significant changes based on the diagnostic superiority of absolute over relative changes<sup>3,4</sup>. Based on studies of the biological variation of cTn<sup>5,6</sup> as well as on data from previous chest pain cohort studies<sup>7,8</sup>, a significant absolute change was defined as a rise or fall of at least 10ng/l within six hours. In patients, in whom a 6 hour hs-cTnT level was not available, changes were assessed at earlier time points. In an assumption of near-linearity, an absolute change of 6ng/l within three hours was considered.

### **3) Assumption of linearity of absolute changes within the first hours**

The assumption of linearity of absolute changes within the first hours is based on unpublished internal data as well as recent data from Ola Hammarsten et al. showing a near-linear increase in levels of cTn with increasing time from symptom onset in their NSTEMI cohort.<sup>9</sup>

Calculation of the glomerular filtration rate was performed using the abbreviated Modification of Diet in Renal disease formula<sup>10</sup>.

## SUPPLEMENTAL TABLES

| Supplemental Table 1   | Latest hs-cTnT value available x hours after presentation (all patients n=1320) |     |
|------------------------|---------------------------------------------------------------------------------|-----|
|                        | n                                                                               | %   |
| ≥0h after presentation | 1320                                                                            | 100 |
| ≥1h after presentation | 1320                                                                            | 100 |
| ≥2h after presentation | 1320                                                                            | 100 |
| ≥3h after presentation | 1208                                                                            | 92  |
| ≥4h after presentation | 851                                                                             | 64  |
| ≥5h after presentation | 725                                                                             | 55  |
| ≥6h after presentation | 695                                                                             | 53  |

| Supplemental Table 2   | Latest hs-cTnT value available x hours after presentation (all patients n=1320) |     |
|------------------------|---------------------------------------------------------------------------------|-----|
|                        | n                                                                               | %   |
| ≥0h after presentation | 1320                                                                            | 100 |
| ≥1h after presentation | 1320                                                                            | 100 |
| ≥2h after presentation | 1320                                                                            | 100 |
| ≥3h after presentation | 1306                                                                            | 99  |
| ≥4h after presentation | 1263                                                                            | 96  |
| ≥5h after presentation | 1191                                                                            | 90  |
| ≥6h after presentation | 1096                                                                            | 83  |

## SUPPLEMENTAL FIGURE 1

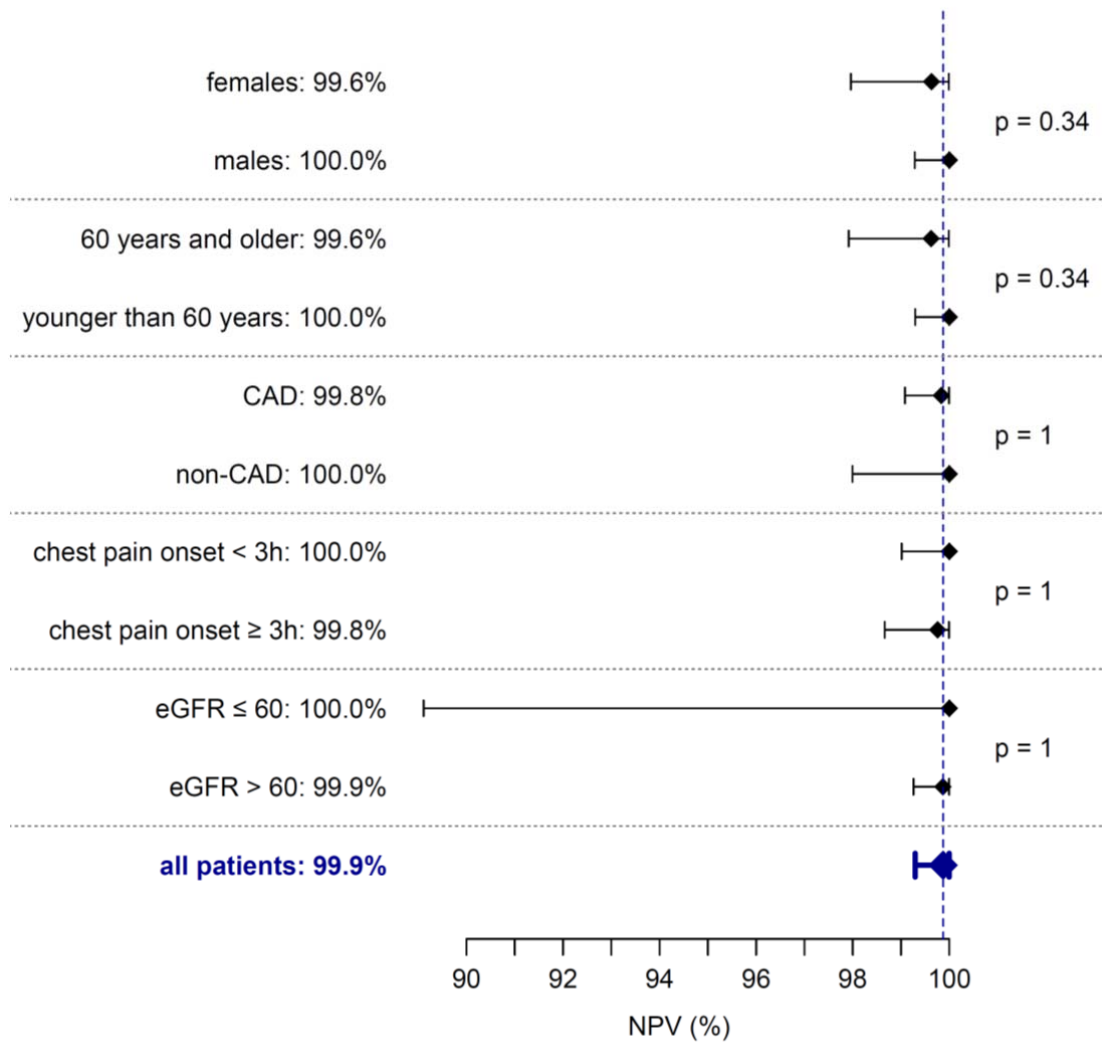

Suppl

Figure 1

Forest plot indicating NPV of the 1h-algorithm in study subgroups

## SUPPLEMENTAL REFERENCES

1. Apple FS, Wu AH, Jaffe AS. European Society of Cardiology and American College of Cardiology guidelines for redefinition of myocardial infarction: how to use existing assays clinically and for clinical trials. *American heart journal*. Dec 2002;144(6):981-986.
2. Apple FS, Jesse RL, Newby LK, et al. National Academy of Clinical Biochemistry and IFCC Committee for Standardization of Markers of Cardiac Damage Laboratory Medicine Practice Guidelines: Analytical issues for biochemical markers of acute coronary syndromes. *Circulation*. Apr 3 2007;115(13):e352-355.
3. Reichlin T, Irfan A, Twerenbold R, et al. Utility of absolute and relative changes in cardiac troponin concentrations in the early diagnosis of acute myocardial infarction. *Circulation*. Jul 12 2011;124(2):136-145.
4. Thygesen K, Mair J, Giannitsis E, et al. How to use high-sensitivity cardiac troponins in acute cardiac care. *European heart journal*. Jun 21 2012.
5. Vasile VC, Saenger AK, Kroning JM, Jaffe AS. Biological and analytical variability of a novel high-sensitivity cardiac troponin T assay. *Clin Chem*. Jul 2010;56(7):1086-1090.
6. Wu AH, Lu QA, Todd J, Moecks J, Wians F. Short- and long-term biological variation in cardiac troponin I measured with a high-sensitivity assay: implications for clinical practice. *Clin Chem*. Jan 2009;55(1):52-58.
7. Keller T, Zeller T, Peetz D, et al. Sensitive troponin I assay in early diagnosis of acute myocardial infarction. *The New England journal of medicine*. Aug 27 2009;361(9):868-877.
8. Apple FS, Pearce LA, Smith SW, Kaczmarek JM, Murakami MM. Role of monitoring changes in sensitive cardiac troponin I assay results for early diagnosis of myocardial infarction and prediction of risk of adverse events. *Clin Chem*. May 2009;55(5):930-937.
9. Hammarsten O, Fu ML, Sigurjonsdottir R, et al. Troponin T percentiles from a random population sample, emergency room patients and patients with myocardial infarction. *Clinical chemistry*. Mar 2012;58(3):628-637.
10. Levey AS, Coresh J, Greene T, et al. Using standardized serum creatinine values in the modification of diet in renal disease study equation for estimating glomerular filtration rate. *Annals of internal medicine*. Aug 15 2006;145(4):247-254.

## Supplemental Tables

| Suppl Table 1                                   | Baseline Characteristics of the Patients |                                             |                                  |         |
|-------------------------------------------------|------------------------------------------|---------------------------------------------|----------------------------------|---------|
|                                                 | All patients<br>(n=1656)                 | 0h & 1h<br>samples<br>available<br>(n=1320) | Samples<br>incomplete<br>(n=336) | P Value |
| Age – yr                                        | 60 (49 – 74)                             | 60 (49 – 73)                                | 61 (47 – 76)                     | 0.46    |
| Male gender – no. (%)                           | 1146 (69)                                | 915 (69)                                    | 231 (69)                         | 0.84    |
| Risk factors – no. (%)                          |                                          |                                             |                                  |         |
| Hypertension                                    | 972 (59)                                 | 770 (58)                                    | 202 (21)                         | 0.55    |
| Hypercholesterolemia                            | 820 (50)                                 | 658 (50)                                    | 162 (48)                         | 0.59    |
| Diabetes                                        | 273 (17)                                 | 218 (17)                                    | 55 (16)                          | 0.95    |
| Current smoking                                 | 433 (26)                                 | 345 (26)                                    | 88 (26)                          | 0.95    |
| History of smoking                              | 613 (37)                                 | 501 (38)                                    | 112 (34)                         | 0.13    |
| History – no. (%)                               |                                          |                                             |                                  |         |
| Coronary artery disease                         | 557 (34)                                 | 440 (33)                                    | 117 (35)                         | 0.61    |
| Previous myocardial infarction                  | 388 (23)                                 | 305 (23)                                    | 83 (25)                          | 0.54    |
| Previous revascularization                      | 465 (28)                                 | 372 (28)                                    | 93 (28)                          | 0.86    |
| Peripheral artery disease                       | 93 (6)                                   | 71 (5)                                      | 22 (7)                           | 0.41    |
| Previous stroke                                 | 87 (5)                                   | 75 (6)                                      | 12 (4)                           | 0.12    |
| Creatinine clearance - (ml/min/m <sup>2</sup> ) | 85 (70 – 101)                            | 85 (70 – 101)                               | 83 (62 – 101)                    | 0.19    |
| Adjudicated final diagnosis                     |                                          |                                             |                                  |         |
| Acute myocardial infarction                     | 295 (18)                                 | 229 (17)                                    | 66 (20)                          | 0.33    |
| Unstable Angina                                 | 137 (8)                                  | 109 (8)                                     | 28 (8)                           | 0.96    |
| Cardiac but non coronary disease                | 234 (14)                                 | 194 (15)                                    | 40 (12)                          | 0.26    |
| Non-cardiac chest pain                          | 920 (56)                                 | 732 (56)                                    | 188 (56)                         | 0.87    |
| Unknown                                         | 70 (4)                                   | 56 (4)                                      | 14 (4)                           | 0.95    |
